# Supplementary material for: Pressure-induced novel nitrogen-rich aluminum nitrides: AlN6, Al2N7and AlN7with polymeric nitrogen chains and rings
Source: Royal Society of Chemistry journal article supplement (doi:10.1039/d1cp01027a), 2021-01-01
Supplement: d1cp01027a1.pdf [file d1cp01027a1.pdf]

ARTICLE

## Pressure-induced Novel Nitrogen-Rich Aluminum Nitrides: $\text{AlN}_6$ , $\text{Al}_2\text{N}_7$ and $\text{AlN}_7$ with Polymeric Nitrogen Chain and Ring

Received 00th January 20xx,  
Accepted 00th January 20xx

Huifang Du,<sup>a</sup> Yanfeng Ge,<sup>b</sup> Jinlong Zhu,<sup>\*c</sup> Wei Guo,<sup>\*a,d</sup> and Yugui Yao<sup>a,d,e</sup>

DOI: 10.1039/x0xx00000x

<sup>a</sup>Key laboratory of advanced optoelectronic quantum architecture and measurement (MOE), School of Physics, Beijing Institute of Technology, Beijing 100081, China.

<sup>b</sup>State Key Laboratory of Metastable Materials Science and Technology & Key Laboratory for Microstructural Material Physics of Hebei Province, School of Science, Yanshan University, Qinhuangdao, 066004, China.

<sup>c</sup>Department of Physics, Southern University of Science and Technology (SUSTech), Shenzhen 518055, China.

<sup>d</sup>Frontiers Science Center for High Energy Material (MOE), Beijing Institute of Technology, Beijing 100081, China.

<sup>e</sup>State Key Laboratory of Explosion Science and Technology, Beijing Institute of Technology, Beijing 100081, China.

E-mail: weiguo7@bit.edu.cn and zhujl@sustech.edu.cn

<sup>†</sup>Electronic Supplementary Information (ESI) available: Supplementary material includes structural information, fluctuations of the total energies obtained by molecular dynamics simulation under high temperature, electronic structure and phonon spectrum under high pressure. See DOI: 10.1039/x0xx00000x

**Table S1.** The unit-cell parameters and atomic positions of Al-N phases at different pressure.

| structures                                     | lattice parameters(Å)                                                                        | atomic coordinates                                                                                                                                                                                                               |
|------------------------------------------------|----------------------------------------------------------------------------------------------|----------------------------------------------------------------------------------------------------------------------------------------------------------------------------------------------------------------------------------|
| Cm-AlN <sub>2</sub><br>P = 0 GPa               | a = 9.76<br>b = 3.10<br>c = 5.91<br>$\alpha$ = 90.00<br>$\beta$ = 154.08<br>$\gamma$ = 90.00 | Al1(0.098,0.000,0.866)<br>Al2(0.113,0.000,0.360)<br>Al3(0.598,0.500,0.866)<br>Al4(0.613,0.500,0.360)<br>N1(0.855,0.500,0.988)<br>N2 (0.355,0.000, 0.988)                                                                         |
| $\bar{P}3m_1$ -Al <sub>2</sub> N<br>P = 20 GPa | a = 2.81<br>b = 2.81<br>c = 8.67<br>$\alpha$ = 90.00<br>$\beta$ = 90.00<br>$\gamma$ = 120.00 | Al1 (0.333, 0.667, 0.768)<br>Al2 (0.667, 0.333, 0.232)<br>Al3(0.000, 0.000, 0.500)<br>Al4(0.000, 0.000, 0.000)<br>N1 (0.667, 0.333, 0.632)<br>N2(0.333, 0.667, 0.368)                                                            |
| $\bar{P}3m_1$ -Al <sub>2</sub> N<br>P = 40 GPa | a = 2.74<br>b = 2.74<br>c = 4.25<br>$\alpha$ = 90.00<br>$\beta$ = 90.00<br>$\gamma$ = 120.00 | Al1 (0.333, 0.667, 0.768)<br>Al2 (0.667, 0.333, 0.232)<br>N1 (0.000, 0.000, 0.500)                                                                                                                                               |
| $P2/m$ - Al <sub>2</sub> N<br>P = 60 GPa       | a = 3.90<br>b = 2.63<br>c = 2.65<br>$\alpha$ = 90.00<br>$\beta$ = 96.75<br>$\gamma$ = 90.00  | Al1 (0.000, 0.000, 0.000)<br>Al2 (0.500, 0.500, 0.500)<br>N1 (0.500, 0.000, 0.000)                                                                                                                                               |
| $\bar{P}3m_1$ -Al <sub>2</sub> N<br>P = 80 GPa | a = 2.64<br>b = 2.64<br>c = 4.13<br>$\alpha$ = 90.00<br>$\beta$ = 90.00<br>$\gamma$ = 120.00 | Al1 (0.667, 0.333, 0.768)<br>Al2 (0.333, 0.667, 0.232)<br>N1 (0.000, 0.000, 0.500)                                                                                                                                               |
| $P6_3mc$ -AlN<br>P = 0 GPa                     | a = 3.12<br>b = 3.12<br>c = 4.88<br>$\alpha$ = 90.00<br>$\beta$ = 90.00<br>$\gamma$ = 120.00 | Al1 (0.333, 0.667, 0.250)<br>Al2 (0.667, 0.333, 0.750)<br>N1 (0.333, 0.667, 0.750)<br>N2 (0.667, 0.333, 0.250)                                                                                                                   |
| $Fm\bar{3}m$ -AlN<br>P = 20 GPa                | a = 3.04<br>b = 3.04<br>c = 3.75<br>$\alpha$ = 90.00<br>$\beta$ = 90.00<br>$\gamma$ = 120.00 | Al1 (0.500, 0.000, 0.000)<br>Al2 (0.500, 0.500, 0.500)<br>Al3 (0.000, 0.000, 0.500)<br>Al4 (0.000, 0.500, 0.000)<br>N1 (0.000, 0.000, 0.000)<br>N2 (0.000, 0.500, 0.500)<br>N3 (0.500, 0.000, 0.500)<br>N4 (0.500, 0.500, 0.000) |
|                                                |                                                                                              | Al1 (0.058,0.500, 0.236)<br>Al2 (0.942,0.500,0.764)                                                                                                                                                                              |

|                                                           |                                                                                              |                                                                                                                                                                                                                                                            |
|-----------------------------------------------------------|----------------------------------------------------------------------------------------------|------------------------------------------------------------------------------------------------------------------------------------------------------------------------------------------------------------------------------------------------------------|
| $R\bar{3}m$ -Al <sub>2</sub> N <sub>3</sub><br>P = 0 GPa  | a = 7.11<br>b = 2.75<br>c = 6.64<br>$\alpha$ = 90.00<br>$\beta$ = 132.00<br>$\gamma$ = 90.00 | Al3 (0.558,0.000,0.236)<br>Al4 (0.442,0.000,0.764)<br>N1 (0.0662,0.000,0.462)<br>N2 (0.434, 0.500,0.538)<br>N3 (0.000,0.000,0.000)<br>N4 (0.566,0.500,0.462)<br>N5 (0.934,0.000,0.538)<br>N6 (0.500,0.500,0.000)                                           |
| $R\bar{3}m$ -Al <sub>2</sub> N <sub>3</sub><br>P = 20 GPa | a = 6.00<br>b = 6.00<br>c = 6.00<br>$\alpha$ = 27.04<br>$\beta$ = 27.04<br>$\gamma$ = 27.04  | Al1(0.733,0.733,0.733)<br>Al2(0.267,0.267,0.267)<br>N1(0.461,0.461,0.461)<br>N2(0.000,0.000,0.000)<br>N3(0.539,0.539,0.538)                                                                                                                                |
| $Cmmm$ -Al <sub>2</sub> N <sub>3</sub><br>P = 40 GPa      | a = 5.88<br>b = 4.91<br>c = 2.57<br>$\alpha$ = 90.00<br>$\beta$ = 90.00<br>$\gamma$ = 90.00  | Al1(0.750,0.250,0.500)<br>Al2(0.750,0.750,0.500)<br>Al3(0.250,0.750,0.500)<br>Al4(0.250,0.250,0.500)<br>N1(0.118,0.000,0.000)<br>N2(0.500,0.000,0.500)<br>N3(0.882,0.000,0.000)<br>N4(0.618,0.500,0.000)<br>N5(0.000,0.500,0.500)<br>N6(0.382,0.500,0.000) |
| $R\bar{3}m$ -Al <sub>2</sub> N <sub>3</sub><br>P = 60 GPa | a = 5.85<br>b = 5.85<br>c = 5.85<br>$\alpha$ = 26.63<br>$\beta$ = 26.63<br>$\gamma$ = 26.63  | Al1(0.267,0.267,0.267)<br>Al2(0.733,0.733,0.733)<br>N1(0.461,0.461,0.461)<br>N2(0.000,0.000,0.000)<br>N3(0.539,0.539,0.539)                                                                                                                                |
| $R\bar{3}m$ -Al <sub>2</sub> N <sub>3</sub><br>P = 80 GPa | a = 5.98<br>b = 5.98<br>c = 5.98<br>$\alpha$ = 25.32<br>$\beta$ = 25.32<br>$\gamma$ = 25.32  | Al1(0.341,0.341,0.341)<br>Al2(0.477,0.477,0.477)<br>N1(0.948,0.948,0.948)<br>N2(0.740,0.740,0.740)<br>N3(0.874,0.874,0.874)                                                                                                                                |
| $R\bar{3}m$ -AlN <sub>2</sub><br>P = 0 GPa                | a = 3.89<br>b = 3.89<br>c = 3.89<br>$\alpha$ = 44.04<br>$\beta$ = 44.04<br>$\gamma$ = 44.04  | Al1 (0.000, 0.000, 0.000)<br>N1 (0.564, 0.564, 0.564)<br>N2 (0.436, 0.436, 0.436)                                                                                                                                                                          |
| $C2/m$ -AlN <sub>2</sub><br>P = 20 GPa                    | a = 4.95<br>b = 2.82<br>c = 9.95<br>$\alpha$ = 90.00<br>$\beta$ = 95.31<br>$\gamma$ = 90.00  | Al1 (0.000,0.500, 0.500)<br>Al2 (0.371,0.500,0.730)<br>Al3 (0.129,0.000,0.270)<br>Al4 (0.500,0.000,0.500)<br>Al5 (0.871,0.000,0.730)<br>Al6 (0.629,0.000,0.730)                                                                                            |

|                                                    |                                                                                              |                                                                                                                                                                                                                                                                                                                           |
|----------------------------------------------------|----------------------------------------------------------------------------------------------|---------------------------------------------------------------------------------------------------------------------------------------------------------------------------------------------------------------------------------------------------------------------------------------------------------------------------|
|                                                    |                                                                                              | N1 (0.0618,0.500,0.832)<br>N2 (0.900, 0.500,0.036)<br>N3 (0.938,0.500,0.168)<br>N4 (0.186,0.000,0.615)<br>N5 (0.314,0.500,0.385)<br>N6 (0.100,0.500,0.964)<br>N7 (0.562,0.000,0.832)<br>N8 (0.400,0.000,0.036)<br>N9 (0.438,0.000,0.168)<br>N10 (0.686,0.500,0.615)<br>N11 (0.814,0.000,0.385)<br>N12 (0.600,0.000,0.964) |
| $P6/mmm$ -AlN <sub>2</sub><br>P = 40 GPa           | a = 2.66<br>b = 2.66<br>c = 4.90<br>$\alpha$ = 90.00<br>$\beta$ = 90.00<br>$\gamma$ = 120.00 | Al1 (0.000, 0.000, 0.000)<br>N1 (0.000, 0.000, 0.382)<br>N2 (0.000, 0.000, 0.617)                                                                                                                                                                                                                                         |
| $Pnnm$ -AlN <sub>2</sub><br>P = 60 GPa             | a = 4.45<br>b = 3.72<br>c = 2.54<br>$\alpha$ = 90.00<br>$\beta$ = 90.00<br>$\gamma$ = 90.00  | Al1 (0.000, 0.000, 0.000)<br>Al2 (0.500, 0.500, 0.500)<br>N1 (0.596, 0.135, 0.000)<br>N2 (0.404, 0.865, 0.000)<br>N3 (0.904, 0.635, 0.500)<br>N4 (0.096, 0.365, 0.500)                                                                                                                                                    |
| $R\bar{3}m$ -AlN <sub>2</sub><br>P = 80 GPa        | a = 4.45<br>b = 3.72<br>c = 2.54<br>$\alpha$ = 90.00<br>$\beta$ = 90.00<br>$\gamma$ = 90.00  | Al1 (0.500, 0.500, 0.500)<br>N1 (0.064, 0.064, 0.064)<br>N2 (0.936, 0.936, 0.936)                                                                                                                                                                                                                                         |
| $P1$ -Al <sub>2</sub> N <sub>5</sub><br>P = 0 GPa  | a = 4.45<br>b = 3.72<br>c = 2.54<br>$\alpha$ = 90.00<br>$\beta$ = 90.00<br>$\gamma$ = 90.00  | Al1(0.301,0.968,0.521)<br>Al2(0.836,0.318,0.820)<br>N1(0.146,0.111,0.179)<br>N2(0.177,0.660,0.818)<br>N3(0.955,0.278,0.057)<br>N4(0.343,0.941,0.302)<br>N5(0.654,0.308,0.570)                                                                                                                                             |
| $Cm$ -Al <sub>2</sub> N <sub>5</sub><br>P = 20 GPa | a = 7.02<br>b = 2.77<br>c = 5.73<br>$\alpha$ = 90.00<br>$\beta$ = 95.68<br>$\gamma$ = 90.00  | Al1(0.161,0.500,0.923)<br>Al2(0.738,0.500,0.449)<br>Al3(0.661,0.000,0.923)<br>Al4(0.238,0.000,0.449)<br>N1(0.791,0.500,0.111)<br>N2(0.014,0.000,0.762)<br>N3(0.837,0.000,0.680)<br>N4(0.979,0.500,0.150)<br>N5(0.038,0.500,0.375)<br>N6(0.291,0.000,0.111)<br>N7(0.514,0.500,0.762)<br>N8(0.337,0.500,0.680)              |

|                                                          |                                                                                              |                                                                                                                                                                                                                                                                                                                                                                                                                     |
|----------------------------------------------------------|----------------------------------------------------------------------------------------------|---------------------------------------------------------------------------------------------------------------------------------------------------------------------------------------------------------------------------------------------------------------------------------------------------------------------------------------------------------------------------------------------------------------------|
|                                                          |                                                                                              | N9(0.480,0.000,0.150)<br>N10(0.538,0.000,0.375)                                                                                                                                                                                                                                                                                                                                                                     |
| $P\bar{1}$ -Al <sub>2</sub> N <sub>5</sub><br>P = 40 GPa | a = 2.77<br>b = 2.77<br>c = 7.59<br>$\alpha$ = 99.69<br>$\beta$ = 96.51<br>$\gamma$ = 62.02  | Al1(0.849,0.396,0.650)<br>Al2(0.151,0.603,0.350)<br>N1(0.815,0.178,0.046 )<br>N2(0.185,0.822,0.955 )<br>N3(0.500,0.000,0.501 )<br>N4(0.211,0.794,0.783 )<br>N5(0.789,0.206,0.219)                                                                                                                                                                                                                                   |
| $P1$ -Al <sub>2</sub> N <sub>5</sub><br>P = 60 GPa       | a = 2.66<br>b = 2.70<br>c = 5.31<br>$\alpha$ = 93.30<br>$\beta$ = 92.68<br>$\gamma$ = 110.52 | Al1(0.599,0.099,0.873)<br>Al2(0.136,0.234,0.408)<br>N1(0.428,0.839,0.335)<br>N2(0.241,0.351,0.064)<br>N3(0.944,0.812,0.706)<br>N4(0.407,0.725,0.099)<br>N5(0.765,0.455,0.631)                                                                                                                                                                                                                                       |
| $P1$ -Al <sub>2</sub> N <sub>5</sub><br>P = 80 GPa       | a = 2.52<br>b = 3.88<br>c = 4.75<br>$\alpha$ = 99.64<br>$\beta$ = 77.38<br>$\gamma$ = 94.90  | Al1(0.367,0.764,0.472)<br>Al2(0.358,0.189,0.102)<br>N1(0.809,0.832,0.102)<br>N2(0.934,0.320,0.829)<br>N3(0.950,0.666,0.833)<br>N4(0.829,0.400,0.384)<br>N5(0.886,0.143,0.556)                                                                                                                                                                                                                                       |
| $Cm$ -AlN <sub>3</sub><br>P = 0 GPa                      | a = 7.10<br>b = 7.01<br>c = 3.26<br>$\alpha$ = 90.00<br>$\beta$ = 103.47<br>$\gamma$ = 90.00 | Al1(0.242,0.247,0.074)<br>Al2(0.242,0.753,0.074)<br>Al3(0.742,0.747,0.074)<br>Al4(0.742,0.253,0.074)<br>N1(0.355,0.181,0.636)<br>N2(0.855,0.319,0.636)<br>N3(0.401,0.500,0.121)<br>N4(0.067,0.000,0.073)<br>N5(0.527,0.098,0.784)<br>N6(0.027,0.402,0.784)<br>N7(0.855,0.681,0.636)<br>N8(0.355,0.819,0.636)<br>N9(0.901,0.000,0.121)<br>N10(0.567,0.500,0.073)<br>N11(0.027,0.598,0.784)<br>N12(0.527,0.902,0.784) |
| $P\bar{1}$ -AlN <sub>3</sub><br>P = 20 GPa               | a = 2.80<br>b = 4.67<br>c = 4.90<br>$\alpha$ = 79.24<br>$\beta$ = 92.58<br>$\gamma$ = 94.22  | Al1(0.256,0.226,0.803)<br>Al2(0.744,0.774,0.197)<br>N1(0.780,0.197,0.088)<br>N2(0.727,0.215,0.540)<br>N3(0.220,0.803,0.912)<br>N4(0.748,0.348, 0.288)<br>N5(0.273,0.785, 0.460)<br>N6(0.252,0.652,0.712)                                                                                                                                                                                                            |
|                                                          |                                                                                              | Al1 (0.244, 0.876, 0.090)                                                                                                                                                                                                                                                                                                                                                                                           |

|                                                    |                                                                                                       |                                                                                                                                                                                                                                                                                                                                                                                                                                        |
|----------------------------------------------------|-------------------------------------------------------------------------------------------------------|----------------------------------------------------------------------------------------------------------------------------------------------------------------------------------------------------------------------------------------------------------------------------------------------------------------------------------------------------------------------------------------------------------------------------------------|
| $P2_1/c\text{-AlN}_3$<br>$P = 40 \text{ GPa}$      | $a = 11.56$<br>$b = 3.66$<br>$c = 11.22$<br>$\alpha = 90.00$<br>$\beta = 165.99$<br>$\gamma = 120.00$ | Al2 (0.756, 0.124, 0.910)<br>Al3 (0.756, 0.376, 0.410)<br>Al4 (0.244, 0.624, 0.590)<br>N1 (0.258, 0.755, 0.369)<br>N2 (0.742, 0.245, 0.631)<br>N3 (0.742, 0.255, 0.131)<br>N4 (0.258, 0.745, 0.869)<br>N5 (0.109, 0.656, 0.110)<br>N6 (0.891, 0.344, 0.890)<br>N7 (0.891, 0.156, 0.390)<br>N8 (0.109, 0.844, 0.610)<br>N9 (0.743, 0.957, 0.055)<br>N10 (0.257, 0.043, 0.945)<br>N11 (0.257, 0.457, 0.445)<br>N12 (0.743, 0.543, 0.555) |
| $P1\text{-Al}_2\text{N}_7$<br>$P = 0 \text{ GPa}$  | $a = 3.16$<br>$b = 5.24$<br>$c = 6.98$<br>$\alpha = 101.35$<br>$\beta = 84.46$<br>$\gamma = 91.46$    | Al1(0.885,0.972,0.248)<br>Al2(0.423,0.439,0.120)<br>N1(0.657,0.196,0.687)<br>N2(0.280,0.576,0.527)<br>N3(0.173,0.693,0.676)<br>N4(0.806,0.089,0.533)<br>N5(0.918,0.617,0.174)<br>N6(0.506,0.308,0.839)<br>N7(0.404,0.114,0.188)                                                                                                                                                                                                        |
| $Cm\text{-Al}_2\text{N}_7$<br>$P = 20 \text{ GPa}$ | $a = 5.69$<br>$b = 4.77$<br>$c = 5.27$<br>$\alpha = 90.00$<br>$\beta = 63.26$<br>$\gamma = 90.00$     | Al1(0.153,0.500,0.054)<br>Al2(0.294,0.500,0.478)<br>Al3(0.653,0.000,0.054)<br>Al4(0.794,0.000,0.478)<br>N1(0.243,0.202,0.749)<br>N2(0.804,0.274,0.224)<br>N3(0.304,0.226,0.224)<br>N4(0.061,0.000,0.792)<br>N5(0.159,0.000,0.305)<br>N6(0.429,0.000,0.704)<br>N7(0.243,0.798,0.749)<br>N8(0.743,0.702,0.749)<br>N9(0.304,0.774,0.224)<br>N10(0.804,0.726,0.224)                                                                        |
| $Cm\text{-Al}_2\text{N}_7$<br>$P = 40 \text{ GPa}$ | $a = 5.69$<br>$b = 4.77$<br>$c = 5.27$<br>$\alpha = 90.00$<br>$\beta = 63.26$<br>$\gamma = 90.00$     | Al1(0.153,0.500,0.054)<br>Al2(0.294,0.500,0.478)<br>Al3(0.653,0.000,0.054)<br>Al4(0.794,0.000,0.478)<br>N1(0.243,0.201,0.748)<br>N2(0.804,0.273,0.223)<br>N3(0.304,0.226,0.223)<br>N4(0.060,0.000,0.791)<br>N5(0.159,0.000,0.304)<br>N6(0.429,0.000,0.703)<br>N7(0.243,0.798,0.748)                                                                                                                                                    |

|                                          |                                                                                                                   |                                                                                                                                                                                                                                                                                                                                                                                                                                               |
|------------------------------------------|-------------------------------------------------------------------------------------------------------------------|-----------------------------------------------------------------------------------------------------------------------------------------------------------------------------------------------------------------------------------------------------------------------------------------------------------------------------------------------------------------------------------------------------------------------------------------------|
|                                          |                                                                                                                   | N8(0.743,0.701,0.748)<br>N9(0.304,0.773,0.223)<br>N10(0.804,0.726,0.223)<br>N11(0.560,0.500,0.791)<br>N12(0.659,0.500,0.304)<br>N13(0.929,0.500,0.703)<br>N14(0.743,0.298,0.748)                                                                                                                                                                                                                                                              |
| $C2-Al_2N_7$<br>$P = 80 \text{ GPa}$     | $a = 8.18$<br>$b = 3.52$<br>$c = 4.88$<br>$\alpha = 90.00$<br>$\beta = 127.29$<br>$\gamma = 90.00$                | Al1(0.728,0.832,0.209)<br>Al2(0.771,0.332,0.790)<br>Al3(0.228,0.332,0.209)<br>Al4(0.271,0.832,0.790)<br>N1(0.092,0.224,0.543)<br>N2(0.569,0.197,0.863)<br>N3(0.115,0.539,0.411)<br>N4(0.500,0.452,0.000)<br>N5(0.884,0.539,0.588)<br>N6(0.907,0.224,0.456)<br>N7(0.930,0.697,0.136)<br>N8(0.592,0.724,0.543)<br>N9(0.069,0.697,0.863)<br>N10(0.615,0.039,0.411)<br>N11(0.000,0.952,0.000)<br>N12(0.384,0.039,0.588)<br>N13(0.407,0.724,0.456) |
| $P2/m-AlN_4$<br>$P = 0 \text{ GPa}$      | $a = 4.84$<br>$b = 2.96$<br>$c = 3.76$<br>$\alpha = 90.00$<br>$\beta = 71.75$<br>$\gamma = 90.00$                 | Al1(0.500,0.000,0.000)<br>N1(0.062,0.000,0.343)<br>N2(0.938,0.000,0.657)<br>N3(0.521,0.500,0.325)<br>N4(0.479,0.500,0.675)                                                                                                                                                                                                                                                                                                                    |
| $Pmcm-AlN_4$<br>$P = 20 \text{ GPa}$     | $a = 2.84$<br>$b = 4.11$<br>$c = 7.24$<br>$\alpha = 90.00$<br>$\beta = 90.00$<br>$\gamma = 90.00$                 | Al1(0.000,0.500,0.000)<br>Al2(0.000,0.500,0.500)<br>N1(0.500,0.602,0.835)<br>N2(0.500,0.398,0.335)<br>N3(0.000,0.895,0.329)<br>N4(0.000,0.105,0.829)<br>N5(0.000,0.895,0.171)<br>N6(0.000,0.105,0.671)<br>N7(0.500,0.398,0.165)<br>N8(0.500,0.602,0.665)                                                                                                                                                                                      |
| $P\bar{1}-AlN_4$<br>$P = 40 \text{ GPa}$ | $a = 2.86$<br>$b = 3.56$<br>$c = 3.74$<br>$\alpha = 102.88$<br>$\beta = 111.13$<br>$\gamma = 93.98$<br>$a = 3.66$ | Al1 (0.500, 0.000, 0.500)<br>N1 (0.956, 0.305, 0.366)<br>N2 (0.044, 0.695, 0.634)<br>N3 (0.843, 0.349, 0.996)<br>N4 (0.157, 0.651, 0.004)                                                                                                                                                                                                                                                                                                     |
| $Cc2e-AlN_5$<br>$P = 0 \text{ GPa}$      | $a = 4.04$<br>$b = 3.78$                                                                                          | Al1(0.000,0.272,0.000)<br>Al2(0.000,0.772,0.500)                                                                                                                                                                                                                                                                                                                                                                                              |

|                                             |                                                                                                     |                                                                                                                                                                                                                                                                                                                                                                                                                                                                                                                                                                                 |
|---------------------------------------------|-----------------------------------------------------------------------------------------------------|---------------------------------------------------------------------------------------------------------------------------------------------------------------------------------------------------------------------------------------------------------------------------------------------------------------------------------------------------------------------------------------------------------------------------------------------------------------------------------------------------------------------------------------------------------------------------------|
|                                             | $c = 20.49$<br>$\alpha = 90.00$<br>$\beta = 90.00$<br>$\gamma = 90.00$                              | Al3(0.500,0.772,0.000)<br>Al4(0.500,0.272,0.500)<br>N1(0.000,0.770,0.000)<br>N2(0.000,0.270,0.500)<br>N3(0.865,0.867,0.808)<br>N4(0.135,0.867,0.192)<br>N5(0.635,0.867,0.308)<br>N6(0.365,0.867,0.692)<br>N7(0.881,0.972,0.859)<br>N8(0.119,0.972,0.141)<br>N9(0.619,0.972,0.359)<br>N10(0.381,0.972,0.641)<br>N11(0.500,0.270,0.000)<br>N12(0.500,0.770,0.500)<br>N13(0.365,0.367,0.808)<br>N14(0.635,0.367,0.192)<br>N15(0.135,0.367,0.308)<br>N16(0.866,0.367,0.692)<br>N17(0.380,0.472,0.859)<br>N18(0.619,0.472,0.141)<br>N19(0.119,0.472,0.359)<br>N20(0.881,0.472,0.641) |
| $Cm-AlN_5$<br>$P = 20 \text{ GPa}$          | $a = 6.46$<br>$b = 3.10$<br>$c = 20.49$<br>$\alpha = 90.00$<br>$\beta = 107.36$<br>$\gamma = 90.00$ | Al1(0.408,0.000,0.532)<br>Al2(0.908,0.500,0.532)<br>N1(0.205,0.000,0.866)<br>N2(0.772,0.129,0.267)<br>N3(0.772,0.871,0.267)<br>N4(0.112,0.250,0.925)<br>N5(0.112,0.749,0.925)<br>N6(0.705,0.500,0.866)<br>N7(0.272,0.629,0.267)<br>N8(0.272,0.371,0.267)<br>N9(0.612,0.751,0.925)<br>N10(0.612,0.249,0.925)                                                                                                                                                                                                                                                                     |
| $\bar{P}1-AlN_5$<br>$P = 40 \text{ GPa}$    | $a = 3.66$<br>$b = 4.41$<br>$c = 6.72$<br>$\alpha = 85.02$<br>$\beta = 81.98$<br>$\gamma = 66.28$   | Al1(0.010, 0.890, 0.230)<br>N1(0.510, 0.770, 0.660)<br>N2(0.880, 0.770, 0.660)<br>N3(0.850, 0.520, 0.290)<br>N4(0.490, 0.530, 0.300)<br>N5(0.330, 0.000, 0.000)                                                                                                                                                                                                                                                                                                                                                                                                                 |
| $\bar{I}4_2d-AlN_5$<br>$P = 60 \text{ GPa}$ | $a = 5.19$<br>$b = 5.19$<br>$c = 5.14$<br>$\alpha = 90.00$<br>$\beta = 90.00$<br>$\gamma = 90.00$   | Al1(0.000, 0.000, 0.500)<br>Al2(0.500, 0.000, 0.250)<br>Al3(0.500, 0.500, 0.000)<br>Al4(0.000, 0.500, 0.750)<br>N1(0.680, 0.630, 0.650)<br>N2(0.320, 0.370, 0.650)<br>N3(0.630, 0.320, 0.350)<br>N4(0.370, 0.680, 0.350)<br>N5(0.820, 0.630, 0.100)                                                                                                                                                                                                                                                                                                                             |



|                                           |                                                                                               |                                                                                                                                                                                                                                                                                                                                                                                                                              |
|-------------------------------------------|-----------------------------------------------------------------------------------------------|------------------------------------------------------------------------------------------------------------------------------------------------------------------------------------------------------------------------------------------------------------------------------------------------------------------------------------------------------------------------------------------------------------------------------|
|                                           |                                                                                               | N6(0.180, 0.370, 0.100)<br>N7(0.870, 0.320, 0.400)<br>N8(0.130, 0.680, 0.400)<br>N9(0.180, 0.130, 0.150)<br>N10(0.820, 0.870, 0.150)<br>N11(0.130, 0.820, 0.850)<br>N12(0.870, 0.180, 0.850)<br>N13(0.320, 0.130, 0.600)<br>N14(0.680, 0.870, 0.600)<br>N15(0.370, 0.820, 0.900)<br>N16(0.630, 0.180, 0.900)<br>N17(0.000, 0.500, 0.250)<br>N18(0.500, 0.000, 0.750)<br>N19(0.500, 0.500, 0.500)<br>N20(0.000, 0.000, 0.000) |
| $P\bar{1}$ -AlN <sub>6</sub><br>P = 0 GPa | a = 4.82<br>b = 4.84<br>c = 4.11<br>$\alpha$ = 98.33<br>$\beta$ = 107.99<br>$\gamma$ = 109.76 | Al1(0.000,0.000,0.500)<br>N1(0.824,0.703,0.025)<br>N2(0.876,0.697,0.765)<br>N3(0.123,0.303,0.235)<br>N4(0.595,0.017,0.436)<br>N5(0.405,0.984,0.564)<br>N6(0.176,0.297,0.975)                                                                                                                                                                                                                                                 |
| $C2/m$ -AlN <sub>6</sub><br>P = 20 GPa    | a = 11.83<br>b = 2.80<br>c = 3.72<br>$\alpha$ = 90.00<br>$\beta$ = 82.39<br>$\gamma$ = 90     | Al1(0.000,0.000,0.000)<br>Al2(0.500,0.500,0.000)<br>N1(0.839,0.000,0.856)<br>N2(0.661,0.500,0.144)<br>N3(0.987,0.500,0.344)<br>N4(0.682,0.500,0.427)<br>N5(0.013,0.500,0.656)<br>N6(0.817,0.000,0.573)<br>N7(0.339,0.500,0.856)<br>N8(0.161,0.000,0.144)<br>N9(0.487,0.000,0.344)<br>N10(0.182,0.000,0.427)<br>N11(0.513,0.000,0.656)<br>N12(0.317,0.500,0.573)                                                              |
| $C2/m$ -AlN <sub>6</sub><br>P = 40 GPa    | a = 5.11<br>b = 4.96<br>c = 4.30<br>$\alpha$ = 90.00<br>$\beta$ = 63.03<br>$\gamma$ = 90.00   | Al1 (0.000, 0.500, 0.000)<br>Al2 (0.500, 0.000, 0.000)<br>N1 (0.261, 0.000, 0.775)<br>N2 (0.739, 0.000, 0.225)<br>N3 (0.289, 0.264, 0.334)<br>N4 (0.789, 0.236, 0.334)<br>N5 (0.211, 0.235, 0.666)<br>N6 (0.711, 0.264, 0.666)<br>N7 (0.761, 0.500, 0.775)<br>N8 (0.239, 0.500, 0.225)<br>N9 (0.789, 0.764, 0.334)<br>N10 (0.289, 0.736, 0.334)<br>N11 (0.711, 0.736, 0.666)                                                 |

|                                             |                                                                                               |                                                                                                                                                                                                                       |
|---------------------------------------------|-----------------------------------------------------------------------------------------------|-----------------------------------------------------------------------------------------------------------------------------------------------------------------------------------------------------------------------|
|                                             |                                                                                               | N12 (0.211, 0.764, 0.666)                                                                                                                                                                                             |
| <i>Pm</i> -AlN <sub>7</sub><br>P = 0 GPa    | a = 6.11<br>b = 8.07<br>c = 2.85<br>$\alpha$ = 90.00<br>$\beta$ = 81.98<br>$\gamma$ = 90.00   | Al1(0.235,0.500,0.365)<br>N1(0.915,0.500,0.453)<br>N2(0.738,0.500,0.330)<br>N3(0.562,0.500,0.210)<br>N4(0.452,0.814,0.432)<br>N5(0.452,0.186,0.432)<br>N6(0.631,0.838,0.441)<br>N7(0.631,0.162,0.441)                 |
| <i>P6mm</i> -AlN <sub>7</sub><br>P = 20 GPa | a = 5.19<br>b = 5.19<br>c = 3.49<br>$\alpha$ = 90.00<br>$\beta$ = 90.00<br>$\gamma$ = 120.00  | Al1(0.000,0.000,0.672)<br>N1(0.000,0.000,0.166)<br>N2(0.500,0.000,0.666)<br>N3(0.000,0.500,0.666)<br>N4(0.500,0.500,0.666)<br>N5(0.500,0.000,0.345)<br>N6(0.000,0.500,0.345)<br>N7(0.500,0.500,0.345)                 |
| <i>P1</i> -AlN <sub>7</sub><br>P = 40 GPa   | a = 2.77<br>b = 4.58<br>c = 4.72<br>$\alpha$ = 112.39<br>$\beta$ = 94.50<br>$\gamma$ = 92.125 | Al1(0.934, 0.460, 0.523)<br>N1(0.348, 0.252, 0.968)<br>N2(0.967, 0.046, 0.523)<br>N3(0.388, 0.300, 0.251)<br>N4(0.467, 0.492, 0.851)<br>N5(0.840, 0.767, 0.313)<br>N6(0.132, 0.992, 0.766)<br>N7(0.622, 0.772, 0.068) |
| <i>P1</i> -AlN <sub>7</sub><br>P = 80 GPa   | a = 3.47<br>b = 3.84<br>c = 4.12<br>$\alpha$ = 114.75<br>$\beta$ = 91.28<br>$\gamma$ = 101.68 | Al1(0.311, 0.267, 0.965)<br>N1(0.587, 0.355, 0.385)<br>N2(0.967, 0.046, 0.523)<br>N3(0.179, 0.719, 0.290)<br>N4(0.796, 0.176, 0.782)<br>N5(0.965, 0.920, 0.201)<br>N6(0.429, 0.547, 0.671)<br>N7(0.773, 0.121, 0.460) |

**Table S2.** Calculated enthalpies of the predicted Al<sub>x</sub>N<sub>y</sub> compounds at different pressures.

| Structure                                                   | Pressure (GPa) | Enthalpy (eV/atom) | Formation enthalpy(eV/atom) |
|-------------------------------------------------------------|----------------|--------------------|-----------------------------|
| <i>Cm</i> -Al <sub>2</sub> N                                | 0              | -5.897             | -0.628                      |
| <i>p</i> $\bar{3}$ <i>m</i> <sub>1</sub> -Al <sub>2</sub> N | 20             | -4.639             | 0.051                       |
| <i>p</i> $\bar{3}$ <i>m</i> <sub>1</sub> -Al <sub>2</sub> N | 40             | -3.323             | -1.393                      |
| <i>P2/m</i> -Al <sub>2</sub> N                              | 60             | -1.770             | -1.203                      |
| <i>p</i> $\bar{3}$ <i>m</i> <sub>1</sub> -Al <sub>2</sub> N | 80             | -0.843             | -1.820                      |
| <i>P6<sub>3</sub>mc</i> -AlN                                | 0              | -7.445             | -1.412                      |
| <i>Fm</i> $\bar{3}$ <i>m</i> -AlN                           | 20             | -6.263             | -2.036                      |
| <i>Fm</i> $\bar{3}$ <i>m</i> -AlN                           | 40             | -5.304             | -2.524                      |
| <i>Fm</i> $\bar{3}$ <i>m</i> -AlN                           | 60             | -4.398             | -2.913                      |

|                                             |    |        |         |
|---------------------------------------------|----|--------|---------|
| $Fm\bar{3}m$ -AlN                           | 80 | -3.528 | -3.238  |
| $R\bar{3}m$ -Al <sub>2</sub> N <sub>3</sub> | 0  | -7.033 | -0.542  |
| $R\bar{3}m$ -Al <sub>2</sub> N <sub>3</sub> | 20 | -6.153 | -1.454  |
| $Cmmm$ -Al <sub>2</sub> N <sub>3</sub>      | 40 | -4.978 | -1.688  |
| $R\bar{3}m$ -Al <sub>2</sub> N <sub>3</sub> | 60 | -4.260 | -2.224  |
| $R\bar{3}m$ -Al <sub>2</sub> N <sub>3</sub> | 80 | -3.154 | -2.272  |
| $R\bar{3}m$ -AlN <sub>2</sub>               | 0  | -7.203 | -0.407  |
| $C2/m$ -AlN <sub>2</sub>                    | 20 | -6.156 | -0.519  |
| $P6/mmm$ -AlN <sub>2</sub>                  | 40 | -5.160 | -1.530  |
| $Pnnm$ -AlN <sub>2</sub>                    | 60 | -4.295 | -1.892  |
| $R\bar{3}m$ -AlN <sub>2</sub>               | 80 | -3.350 | -2.073  |
| $P1$ -Al <sub>2</sub> N <sub>5</sub>        | 0  | -7.233 | -0.218  |
| $Cm$ -Al <sub>2</sub> N <sub>5</sub>        | 20 | -6.089 | -0.852  |
| $P\bar{1}$ -Al <sub>2</sub> N <sub>5</sub>  | 40 | -5.175 | -1.302  |
| $P1$ -Al <sub>2</sub> N <sub>5</sub>        | 60 | -4.124 | -1.458  |
| $P1$ -Al <sub>2</sub> N <sub>5</sub>        | 80 | -3.322 | -1.7631 |
| $Cm$ -AlN <sub>3</sub>                      | 0  | -6.970 | 0.209   |
| $P\bar{1}$ -AlN <sub>3</sub>                | 20 | -6.151 | -0.277  |
| $P2_1/c$ -AlN <sub>3</sub>                  | 40 | -5.372 | -1.317  |
| $P2_1/c$ -AlN <sub>3</sub>                  | 60 | -4.500 | -1.637  |
| $P2_1/c$ -AlN <sub>3</sub>                  | 80 | -3.668 | -1.898  |
| $P1$ -Al <sub>2</sub> N <sub>7</sub>        | 0  | -7.403 | -0.097  |
| $Cm$ -Al <sub>2</sub> N <sub>7</sub>        | 20 | -6.010 | -0.474  |
| $Cm$ -Al <sub>2</sub> N <sub>7</sub>        | 40 | -6.035 | -1.838  |
| $Cm$ -Al <sub>2</sub> N <sub>7</sub>        | 60 | -4.198 | -1.182  |
| $C2$ -Al <sub>2</sub> N <sub>7</sub>        | 80 | -3.452 | -1.517  |
| $P2/m$ -AlN <sub>4</sub>                    | 0  | -7.436 | -0.029  |
| $Pmcm$ -AlN <sub>4</sub>                    | 20 | -6.259 | -0.242  |
| $P\bar{1}$ -AlN <sub>4</sub>                | 40 | -5.300 | -0.990  |
| $P\bar{1}$ -AlN <sub>4</sub>                | 60 | -4.464 | -1.326  |
| $P\bar{1}$ -AlN <sub>4</sub>                | 80 | -3.430 | -1.364  |
| $Cc2e$ -AlN <sub>5</sub>                    | 0  | -7.582 | -0.022  |
| $Cm$ -AlN <sub>5</sub>                      | 20 | -6.124 | -0.013  |
| $P\bar{1}$ -AlN <sub>5</sub>                | 40 | -5.247 | -0.767  |
| $I\bar{4}2d$ -AlN <sub>5</sub>              | 60 | -4.224 | -0.903  |
| $I\bar{4}2d$ -AlN <sub>5</sub>              | 80 | -3.623 | 2.398   |
| $P\bar{1}$ -AlN <sub>6</sub>                | 0  | -7.511 | 0.158   |
| $C2/m$ -AlN <sub>6</sub>                    | 20 | -6.243 | -0.065  |
| $C2/m$ -AlN <sub>6</sub>                    | 40 | -5.370 | -0.493  |
| $C2/m$ -AlN <sub>6</sub>                    | 60 | -4.509 | -1.056  |
| $C2/m$ -AlN <sub>6</sub>                    | 80 | -3.692 | -1.288  |
| $Pm$ -AlN <sub>7</sub>                      | 0  | -7.282 | 0.469   |
| $P6mm$ -AlN <sub>7</sub>                    | 20 | -5.757 | 0.472   |
| $P1$ -AlN <sub>7</sub>                      | 40 | -5.185 | -1.317  |

|                   |    |        |        |
|-------------------|----|--------|--------|
| $P1\text{-AlN}_7$ | 60 | -4.246 | -0.695 |
| $P1\text{-AlN}_7$ | 80 | -3.615 | -1.105 |

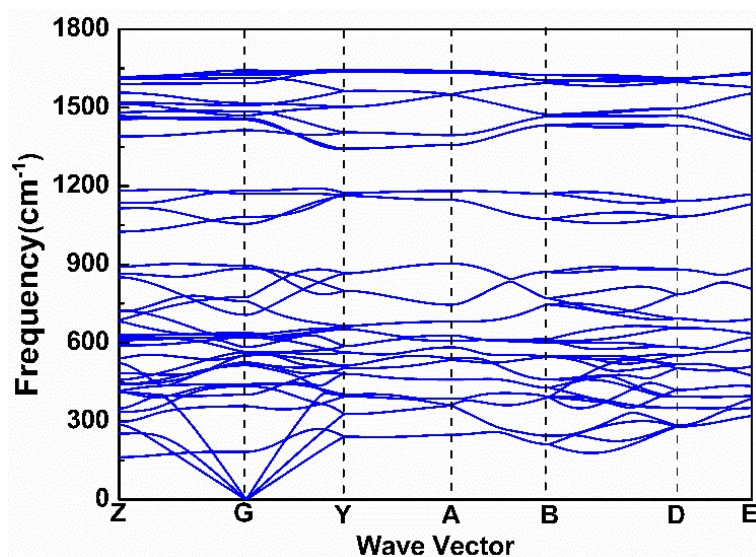

Fig. S1 Phonon dispersion curves of  $C2/m\text{-AlN}_6$  at 30 GPa.

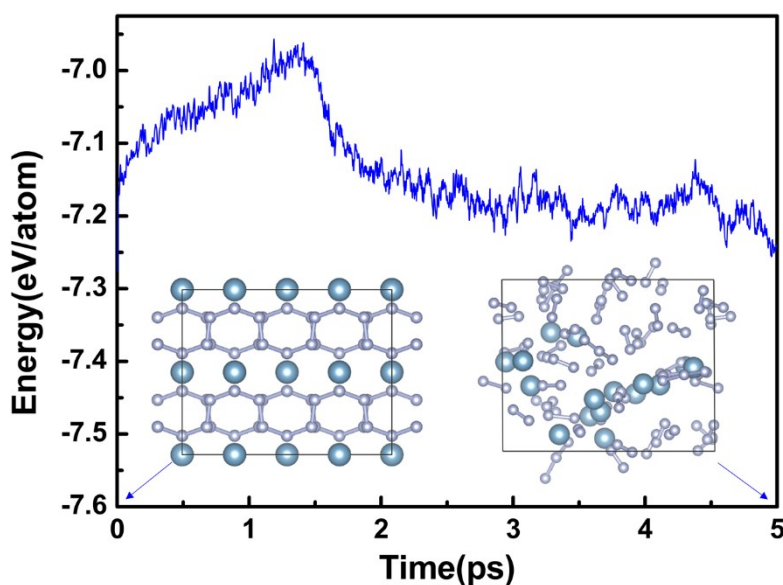

Fig. S2 Fluctuations of the total energies obtained by molecular dynamics simulation under the NPT ensemble at ambient pressure at 1500 K and for  $C2/m\text{-AlN}_6$  phase.

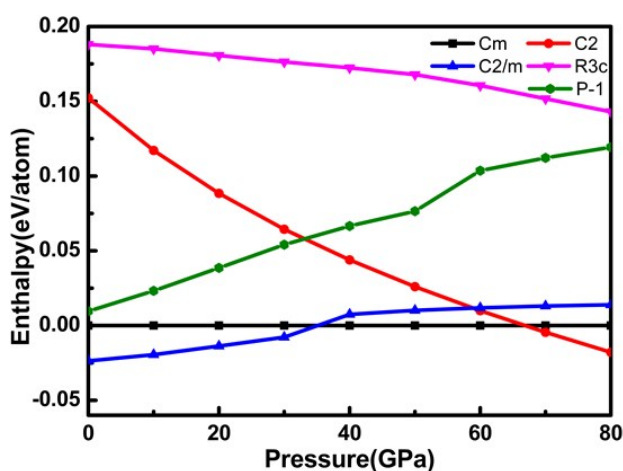

**Fig. S3** Enthalpy difference between Cm- $\text{Al}_2\text{N}_7$  and other phases of  $\text{Al}_2\text{N}_7$ .

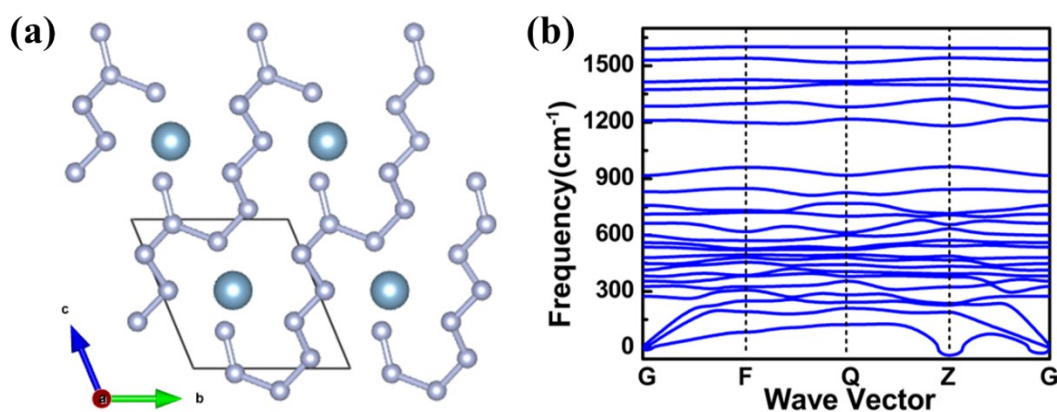

**Fig. S4** (a) Crystal structure and (b) phonon dispersion relation of P1- $\text{AlN}_7$  at 40 GPa.

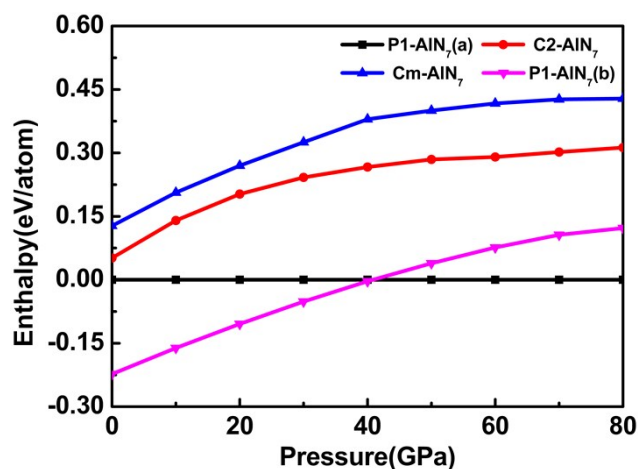

**Fig. S5** Enthalpy difference between P1- $\text{AlN}_7$  and other phases of  $\text{AlN}_7$ . The black line represents the metastable P1- $\text{AlN}_7$  searched under 80 GPa, and the pink line represents the structure searched under 40 GPa.

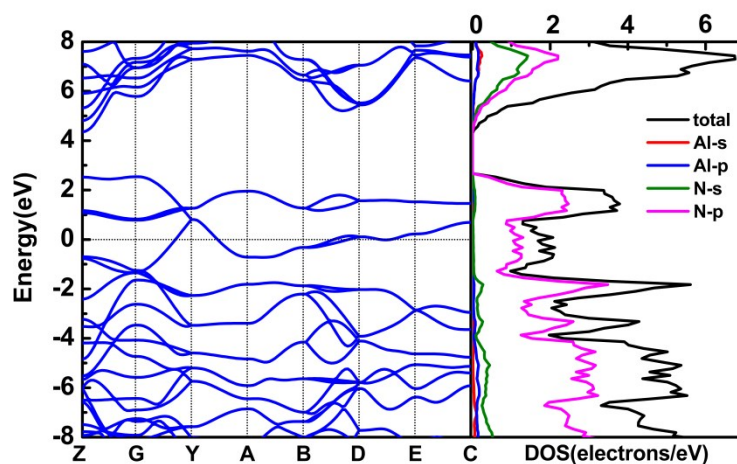

**Fig. S6** Band structure and density of states (DOS) of  $C2/m\text{-AlN}_6$  at 30 GPa.

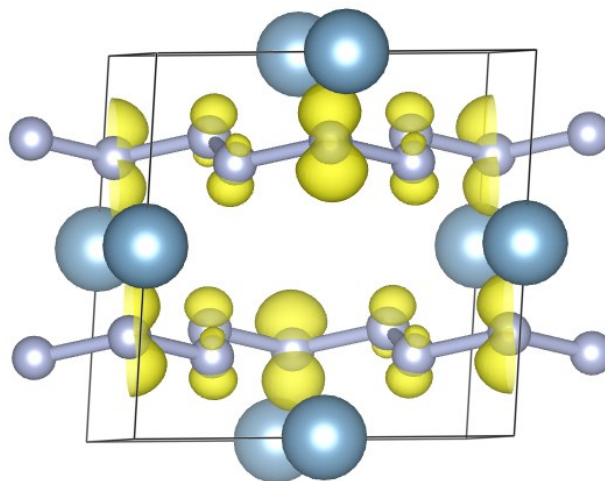

**Fig. S7** Three-dimensional partial charge density distribution of an energy band crossing Fermi energy for  $C2/m\text{-AlN}_6$  at ambient condition. The value of isosurface is 0.01.

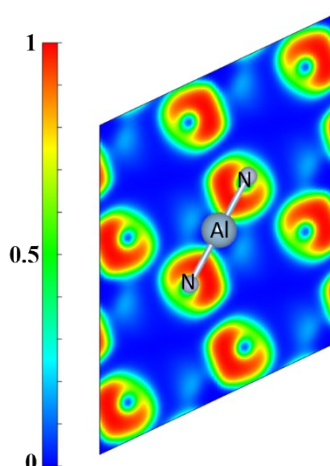

**Fig. S8** Two-dimensional ELF distribution diagram on (010) crystal plane.

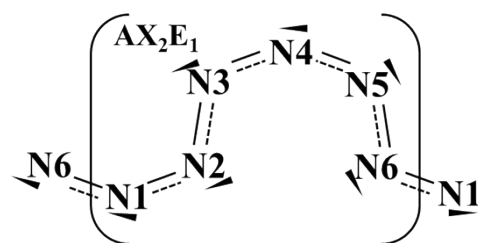

**Fig. S9** The Lewis crystal structure with VSEPR notation for C2/m-AlN<sub>6</sub>.

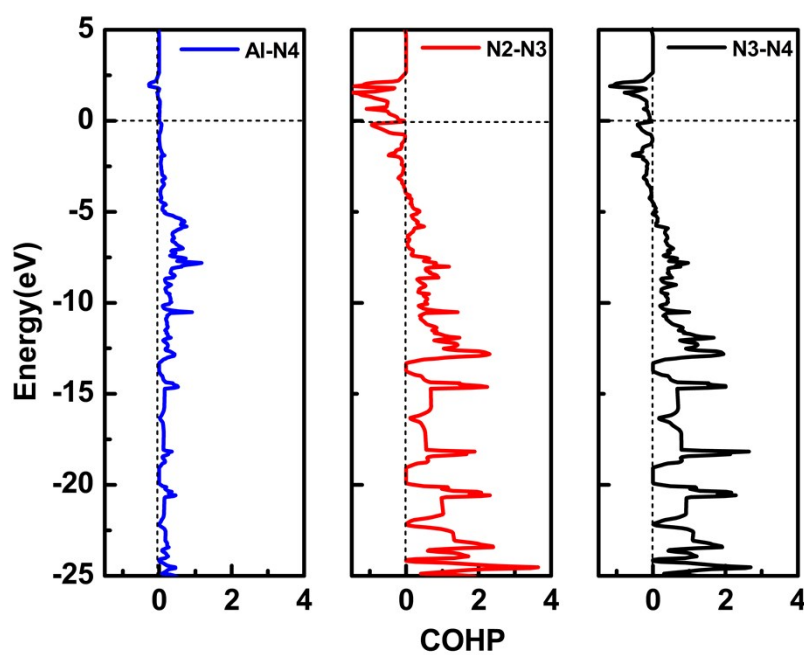

**Fig. S10** COHPs between Al-N4, N2-N3 and N3-N4 pairs for C2/m-AlN<sub>6</sub> phase at 30 GPa. Fermi levels are set at zero energy and marked by dotted lines.

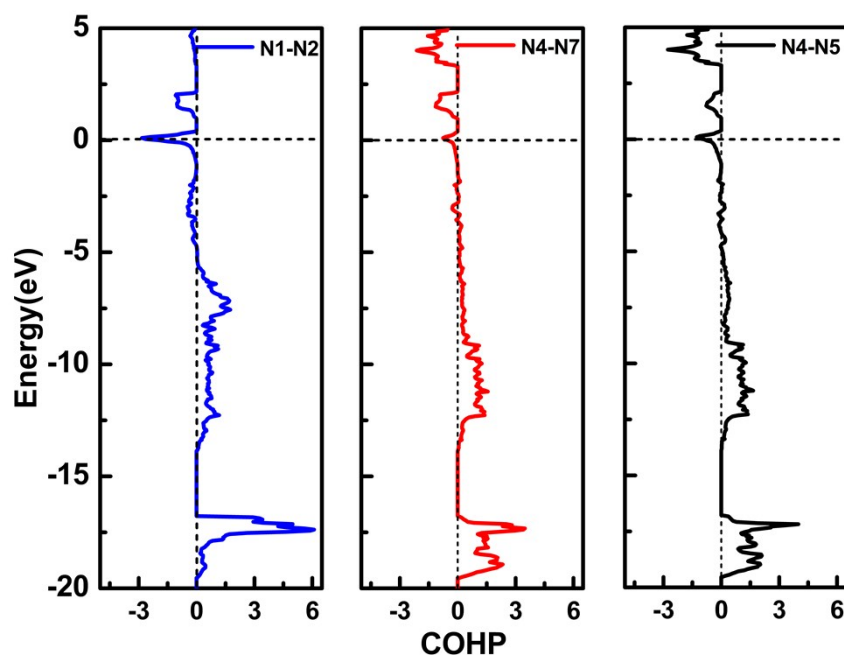

**Fig. S11** COHPs between N1-N2, N4-N7 and N4-N5 pairs for  $C2m\text{-Al}_2\text{N}_7$  phase at 40 GPa. Fermi levels are set at zero energy and marked by dotted lines.

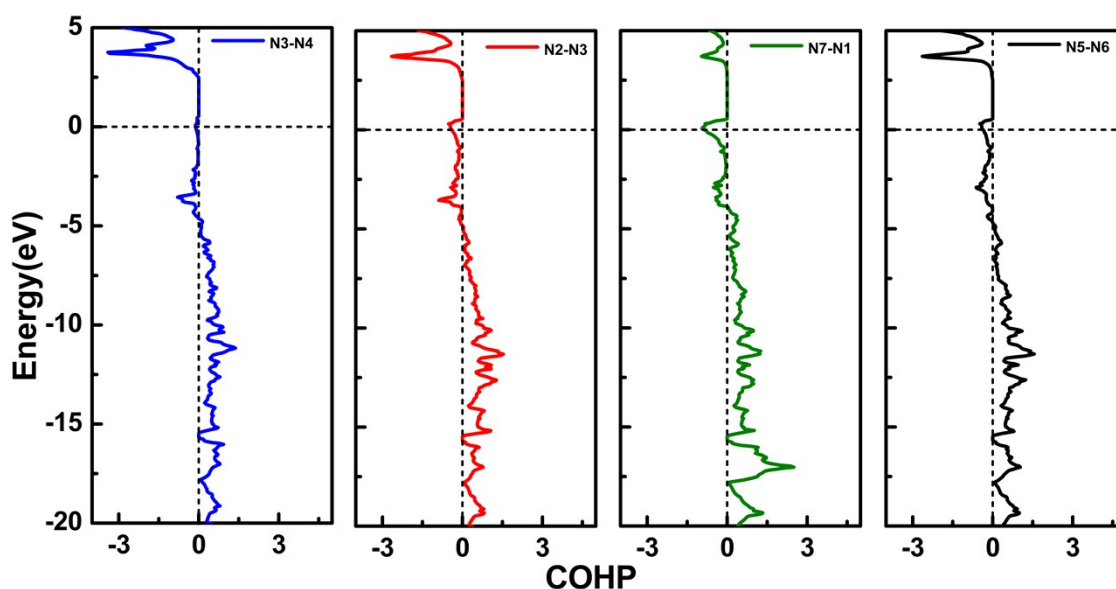

**Fig. S12** COHPs between N3-N4, N2-N3, N7-N1 and N5-N6 pairs for  $C2\text{-Al}_2\text{N}_7$  phase at 80 GPa. Fermi levels are set at zero energy and marked by dotted lines.



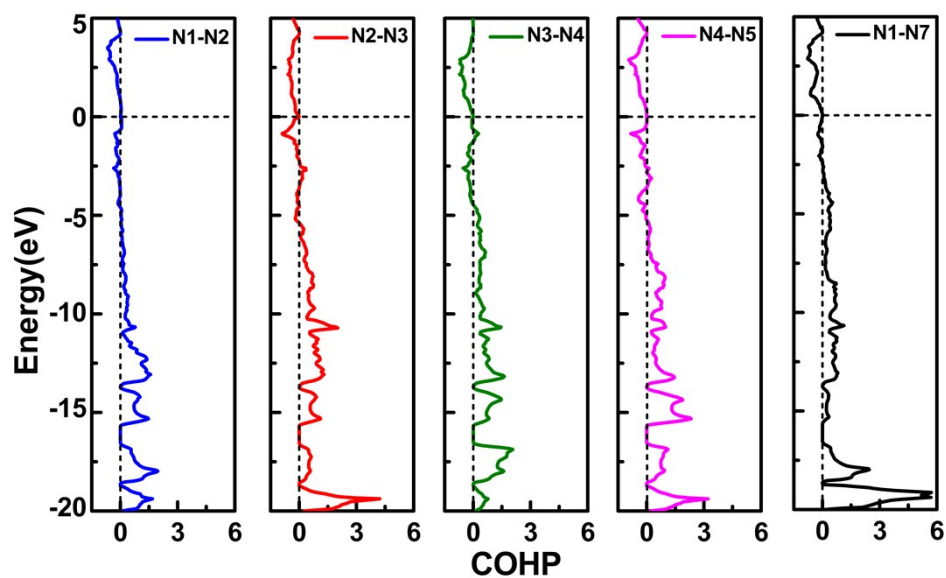

**Fig. S13** COHPs between N1-N2, N2-N3, N3-N4, N4-N5 and N1-N7 pairs for  $P1\text{-AlN}_7$  phase at 80 GPa. Fermi levels are set at zero energy and marked by dotted lines.

**Table S3.** The calculated bond parameters and hardness of C2/m-AlN<sub>6</sub>, Cm-Al<sub>2</sub>N<sub>7</sub>, C2-Al<sub>2</sub>N<sub>7</sub> and P1-AlN<sub>7</sub>.

| Structure                         | V(Å <sup>3</sup> ) | bond | n <sup>μ</sup> | d <sup>μ</sup> (Å) | P <sup>μ</sup> | V <sub>b</sub> <sup>μ</sup> | H <sub>v</sub> <sup>μ</sup> | H <sub>v</sub> (GPa) |
|-----------------------------------|--------------------|------|----------------|--------------------|----------------|-----------------------------|-----------------------------|----------------------|
| C2/m-AlN <sub>6</sub>             | 99.79              | N-N  | 4              | 1.34               | 0.70           | 1.91                        | 176.19                      | 43.86                |
|                                   |                    | N-N  | 8              | 1.37               | 0.69           | 2.04                        | 155.51                      |                      |
|                                   |                    | Al-N | 4              | 1.99               | 0.32           | 6.25                        | 11.15                       |                      |
|                                   |                    | Al-N | 8              | 2.00               | 0.36           | 6.35                        | 12.24                       |                      |
| Cm-Al <sub>2</sub> N <sub>7</sub> | 127.65             | N-N  | 4              | 1.30               | 0.77           | 1.29                        | 374.43                      | 39.32                |
|                                   |                    | N-N  | 4              | 1.36               | 0.67           | 1.47                        | 260.00                      |                      |
|                                   |                    | Al-N | 4              | 1.86               | 0.41           | 3.77                        | 33.25                       |                      |
|                                   |                    | Al-N | 2              | 1.86               | 0.48           | 3.77                        | 38.93                       |                      |
|                                   |                    | Al-N | 2              | 1.87               | 0.35           | 3.83                        | 27.63                       |                      |
|                                   |                    | Al-N | 2              | 1.94               | 0.34           | 4.28                        | 22.34                       |                      |
|                                   |                    | Al-N | 2              | 1.94               | 0.35           | 4.28                        | 23.00                       |                      |
|                                   |                    | Al-N | 4              | 1.98               | 0.40           | 4.55                        | 23.73                       |                      |
|                                   |                    | Al-N | 4              | 2.03               | 0.23           | 4.90                        | 12.05                       |                      |
|                                   |                    | Al-N | 4              | 2.07               | 0.34           | 5.19                        | 16.15                       |                      |
| C2-Al <sub>2</sub> N <sub>7</sub> | 111.78             | N-N  | 4              | 1.30               | 0.77           | 1.07                        | 507.27                      | 63.96                |
|                                   |                    | N-N  | 4              | 1.36               | 0.67           | 1.23                        | 352.25                      |                      |
|                                   |                    | N-N  | 4              | 1.37               | 0.61           | 1.25                        | 309.17                      |                      |
|                                   |                    | Al-N | 4              | 1.86               | 0.41           | 3.14                        | 45.05                       |                      |
|                                   |                    | Al-N | 2              | 1.86               | 0.48           | 3.14                        | 52.74                       |                      |
|                                   |                    | Al-N | 2              | 1.87               | 0.35           | 3.19                        | 37.44                       |                      |
|                                   |                    | Al-N | 4              | 1.94               | 0.35           | 3.56                        | 31.16                       |                      |
|                                   |                    | Al-N | 4              | 1.98               | 0.4            | 3.79                        | 32.15                       |                      |
|                                   |                    | Al-N | 4              | 2.04               | 0.23           | 4.14                        | 15.92                       |                      |
|                                   |                    | Al-N | 2              | 2.10               | 0.23           | 4.52                        | 13.78                       |                      |
|                                   |                    | Al-N | 4              | 2.07               | 0.34           | 4.33                        | 21.88                       |                      |
| P1-AlN <sub>7</sub>               | 48.49              | N-N  | 1              | 1.25               | 0.98           | 2.79                        | 131.08                      | 33.58                |
|                                   |                    | N-N  | 1              | 1.28               | 0.76           | 3.00                        | 90.29                       |                      |
|                                   |                    | N-N  | 1              | 1.30               | 0.80           | 3.14                        | 87.95                       |                      |
|                                   |                    | N-N  | 1              | 1.30               | 0.77           | 3.14                        | 84.65                       |                      |
|                                   |                    | N-N  | 1              | 1.31               | 0.75           | 3.21                        | 79.35                       |                      |
|                                   |                    | N-N  | 1              | 1.32               | 0.71           | 3.29                        | 72.32                       |                      |
|                                   |                    | N-N  | 1              | 1.33               | 0.70           | 3.36                        | 68.66                       |                      |
|                                   |                    | Al-N | 1              | 1.83               | 0.17           | 8.76                        | 3.38                        |                      |
|                                   |                    | Al-N | 1              | 1.83               | 0.69           | 8.76                        | 13.72                       |                      |
|                                   |                    | Al-N | 1              | 1.85               | 0.06           | 9.05                        | 1.13                        |                      |
